# Supplementary material for: Monitoring and manipulating cellular crosstalk during kidney fibrosis inside a 3D in vitro co-culture
Source: PubMed Central journal article supplement (PMC5670242; doi:10.1038/s41598-017-12683-y), 2017-11-03
Supplement: 41598_2017_12683_MOESM1_ESM.pdf [file 41598_2017_12683_MOESM1_ESM.pdf]

1 **Supplementary Information**

2 **Monitoring and manipulating cellular crosstalk during**  
3 **kidney fibrosis inside a 3D in vitro co-culture**

4 **Bramasta Nugraha<sup>1,2,†</sup>, Manuel A. Mohr<sup>1</sup>, Aaron Ponti<sup>1</sup>, Maximilian Y. Emmert<sup>3-6</sup>,**  
5 **Franziska Weibel<sup>2</sup>, Simon P. Hoerstrup<sup>3-6</sup>, Solange Moll<sup>7</sup>, Ulrich Certa<sup>2</sup>, Marco**  
6 **Prunotto<sup>2,‡</sup>, Periklis Pantazis<sup>1,‡</sup>**

7

8 **This file includes**

9

- 10 Supplementary Figure 1. List of clinically relevant nephrotoxins cytotoxicity study in  
11 HKC-8 spheroids (24 hours)
- 12 Supplementary Figure 2. Representative HKC-8 spheroid reporter images during  
13 nephrotoxin treatment
- 14 Supplementary Figure 3. Toxicity assessments of aristolochic acid and cyclosporine A
- 15 Supplementary Figure 4. Human renal fibroblasts 3D culture in dextran hydrogel
- 16 Supplementary Figure 5. TGF $\beta$ 1-treated fibroblasts monoculture identification using  
17  $\alpha$ SMA-staining
- 18 Supplementary Figure 6. Myofibroblasts gene expression analysis using the Taqman  
19 gene expression assay
- 20 Supplementary Table 1. Kidney molecular toxicity pathway analysis of the HKC-8  
21 spheroids' response to nephrotoxins

22

23 **Supplementary Figures**

| Drugs compound    | Pathological results                                              | Working concentration           |
|-------------------|-------------------------------------------------------------------|---------------------------------|
| Cyclosporine A    | Tubular atrophy, collagen matrix deposition in interstitial space | 1.5 $\mu$ M for 24 h incubation |
| Gentamicin        | Tubular necrosis, proximal tubule desquamation                    | No response                     |
| Diclofenac        | Proximal tubule apoptosis, damaged and hypertrophied glomerulus   | No response                     |
| Aristolochic acid | Acute tubular necrosis, tubulointerstitial damage                 | 125 $\mu$ M for 24 h incubation |
| Lithium           | Tubular dystrophy, interstitial fibrosis                          | No response                     |

24

25 **Supplementary Figure S1. List of clinically relevant nephrotoxins cytotoxicity study in**  
 26 **HKC-8 spheroids (24 hours)**

27 HKC-8 spheroids' responses to various clinically relevant nephrotoxins were examined by the  
 28 cell viability assay (MTT). Of the five tested nephrotoxins, HKC-8 spheroids showed a dose  
 29 dependency to cyclosporine A and aristolochic acid. Gentamicin, diclofenac, and lithium did  
 30 not induce an appreciable cytotoxic effect on the HKC-8 3D model. This discrepancy is  
 31 probably due to the fact that we employed immortalized, stably-transfected fluorescent cell  
 32 lines for the 3D model, which might have changed genetically under the subjected  
 33 experimental conditions, leading to the phenotypic differences.

34

a)

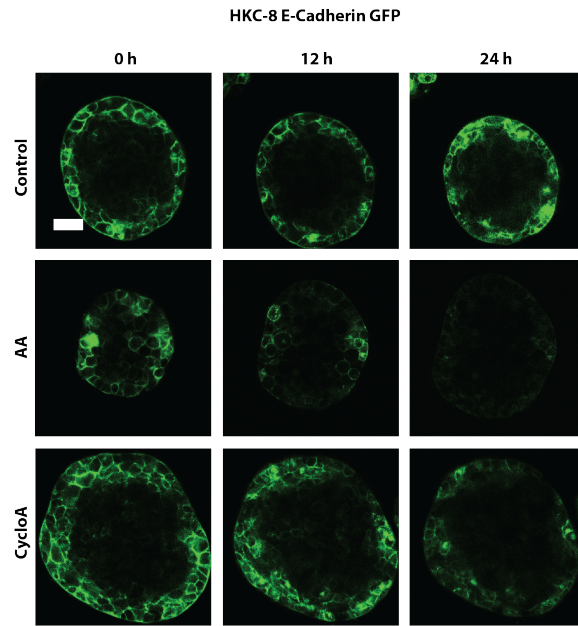

b)

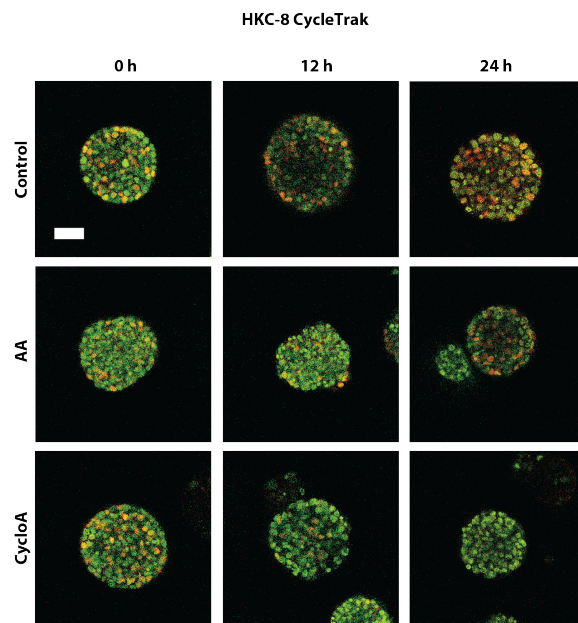

35

36 **Supplementary Figure S2. Representative HKC-8 spheroid reporter images during**  
37 **nephrotoxin treatment**

38 (a) HKC-8 E-cadherin GFP and (b) HKC-8 CycleTrak spheroids during nephrotoxins  
39 treatment. (a), green signal represents E-cadherin. (b), green signal represents G2/M phase,  
40 red signal represents G1 phase, and yellow signal represents S phase. Scale bar, 50  $\mu$ m.

41

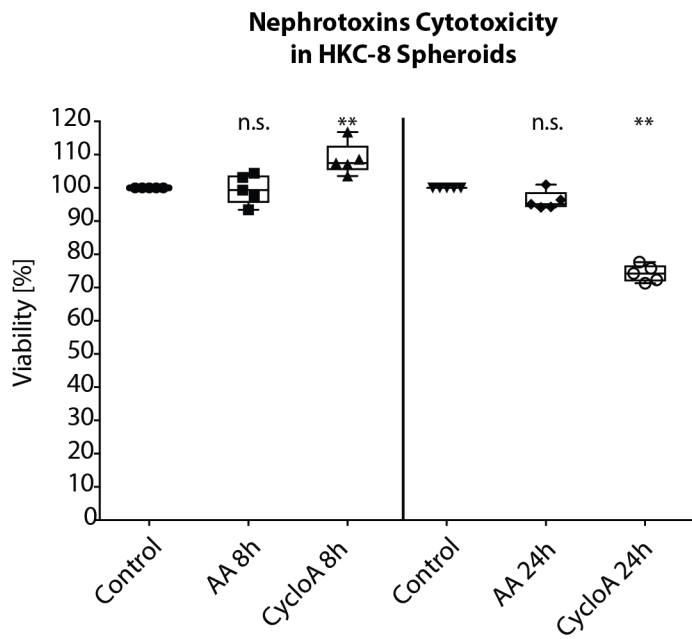

42

43 **Supplementary Figure S3. Toxicity assessments of aristolochic acid and cyclosporine A**

44 Cytotoxicity of aristolochic acid and cyclosporine A at the working concentration in HKC-8  
 45 spheroids were examined by the cell viability assay (MTT) after 8 and 24 hours. After 24  
 46 hours of drug treatment, only cyclosporine A treatment induced noticeable viability reduction  
 47 (n=5). \*\*P<0.01, n.s., not significant (Mann Whitney *U* test).

48

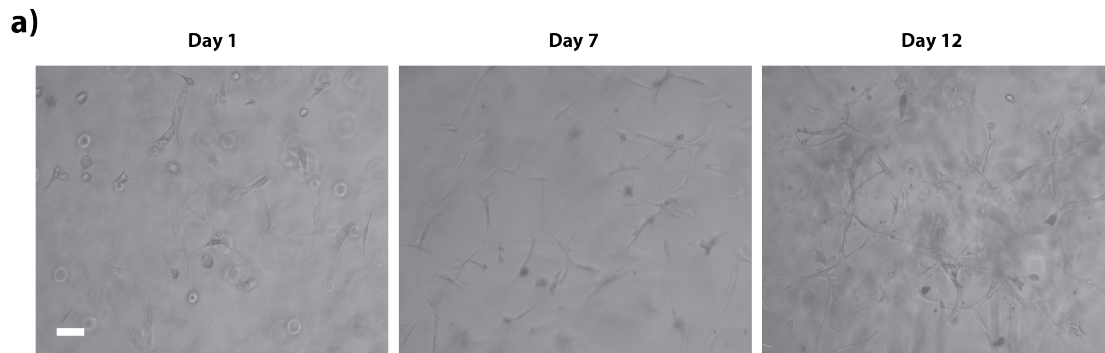

**b)**

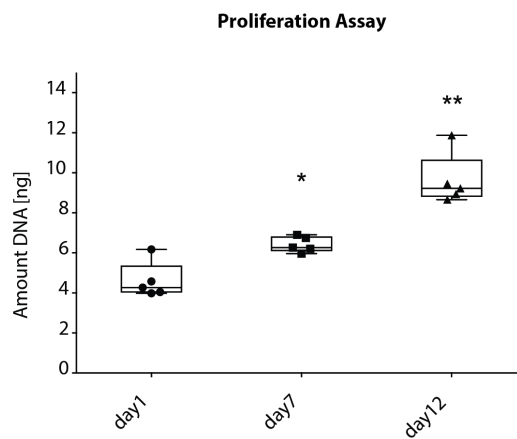

49

50 **Supplementary Figure S4. Human renal fibroblasts 3D culture in dextran hydrogel**

51 Cell migration and proliferation were investigated using (a) bright field images and (b) the  
 52 PicoGreen Assay, respectively. Proliferating renal fibroblasts migrated in the hydrogel over  
 53 the culture forming sprouting constructs (n=5). \*P<0.1; \*\*P<0.01 (Mann Whitney *U* test).

54 Scale bar, 20  $\mu$ m (a).

55

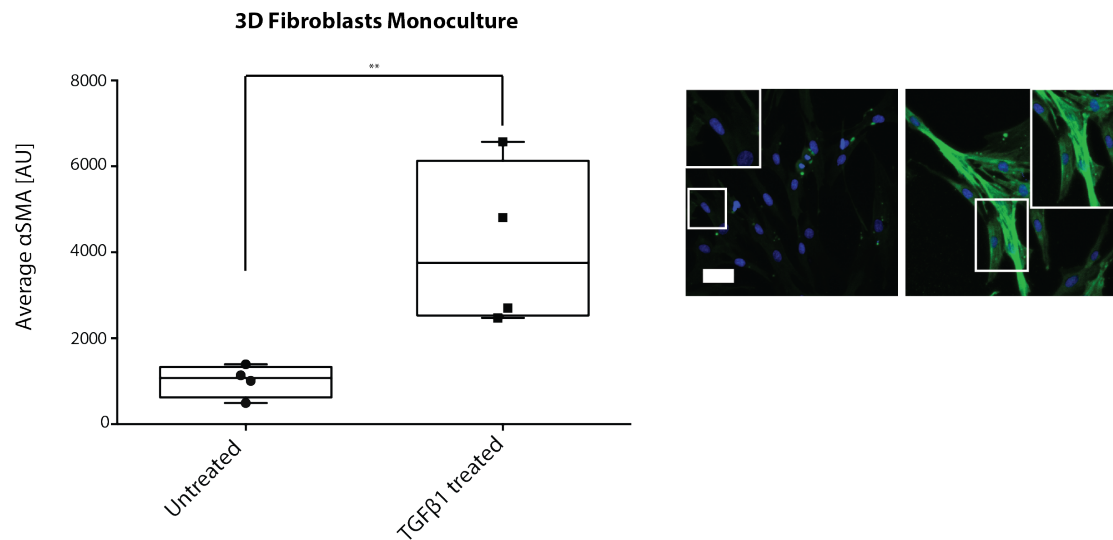

56

57 **Supplementary Figure S5. TGF $\beta$ 1-treated fibroblasts monoculture identification using**  
 58  **$\alpha$ SMA-staining**

59 To confirm that the human renal fibroblasts used in this work respond to profibrogenic  
 60 cytokine TGF $\beta$ 1, a 3D monoculture of human renal fibroblasts in the dextran hydrogel  
 61 containing MMP-sensitive crosslinker was treated with 10 ng/mL TGF $\beta$ 1 for 3 days. The cells  
 62 were then fixed and stained for  $\alpha$ SMA (n=4). \*\*P<0.01. Scale bar, 5  $\mu$ m.

63

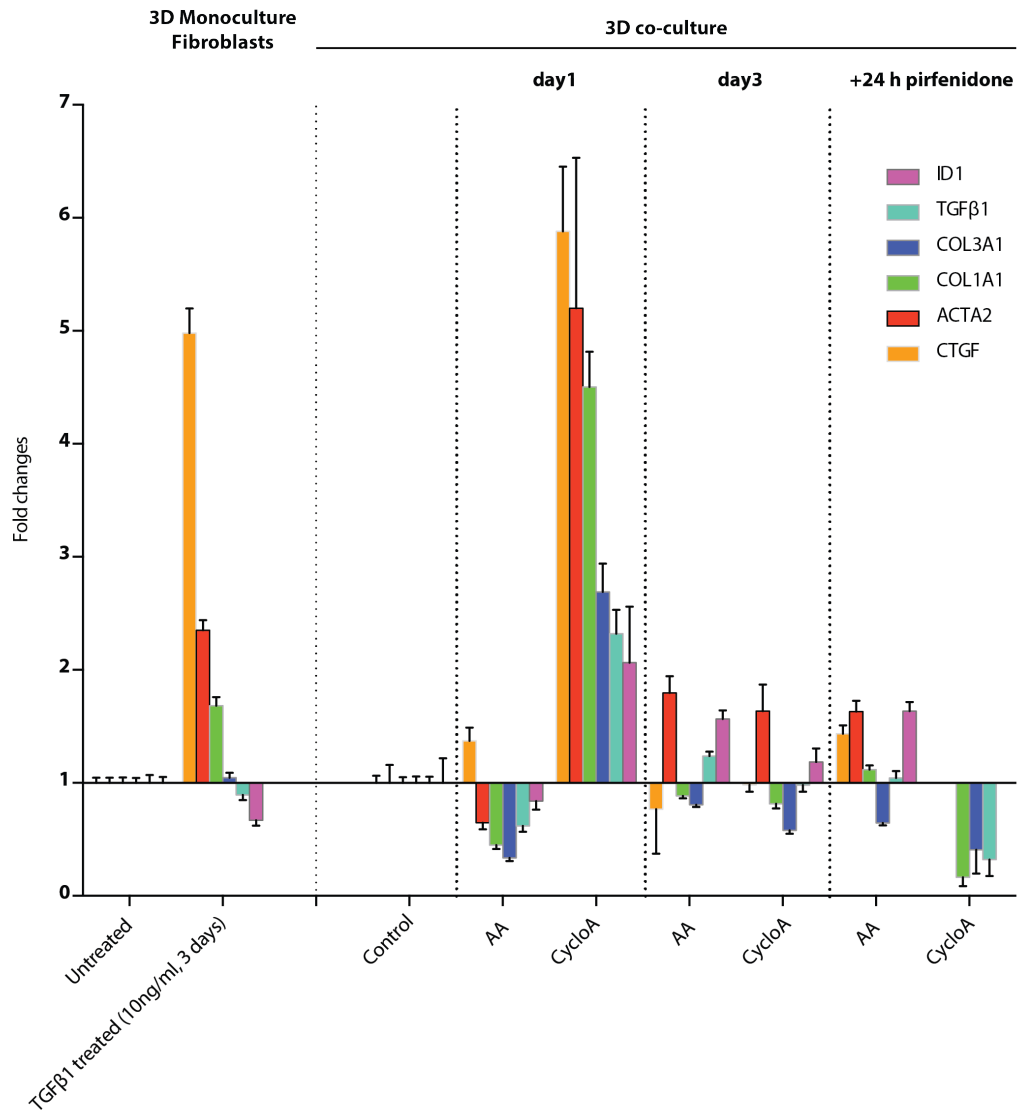

64

65 **Supplementary Figure S6. Myofibroblasts gene expression analysis using the Taqman**  
 66 **gene expression assay**

67 The signature genes of myofibroblasts were analyzed using the Taqman assay, in comparison  
 68 to the human renal fibroblasts treated with TGFβ1 as control. Myofibroblasts activation is  
 69 inhibited upon addition of pirfenidone, a known inhibitor of TGFβ1 production (n=4).

70

71 **Supplementary Table T1. Kidney molecular toxicity pathway analysis of the HKC-8**  
72 **spheroids' response to nephrotoxins**

73 At 8 and 24 hours after treatment of 125  $\mu$ M aristolochic acid and 1.5  $\mu$ M cyclosporine A, the  
74 RNA was extracted from HKC-8 spheroids and analyzed with Mol Tox panel genes (~1600  
75 genes) in Ampliseq. The count readouts from these genes were classified into relevant  
76 pathways/mechanisms. The readouts were then normalized to the readouts of control samples.
